# Supplementary material
Source: publisher figshare collection journal article supplement (https://tandf.figshare.com/articles/dataset/_/6634424)
Supplement: Supplementary file 1 [file 3]

## **A Clinical Carepath for Obese Pregnant Women: A Pragmatic Pilot Cluster Randomized Controlled Trial**

Sarah D. McDonald, BA, MD, FRCSC, MSc<sup>1,2</sup>, Kristen A. Viaje, BHSc<sup>1</sup>, Rebecca A. Rooney, MD<sup>3</sup>, Alexander Jarde, PhD<sup>1</sup>, Lucia Giglia, MD, FRCPC<sup>4</sup>, Cynthia V. Maxwell, MD, FRCSC<sup>5</sup>, David Small, BSc, MD, FRCSC<sup>1,6</sup>, Tracy Pearce Kelly, BScN, BHSc Midwifery, RN, RM<sup>7,8</sup>, Lisa Sabatino, RM<sup>9</sup>, Lehana Thabane, BSc, MSc, PhD<sup>2,10</sup>

<sup>1</sup>Department of Obstetrics and Gynaecology, McMaster University, 1280 Main Street West, Hamilton, Ontario, Canada, L8S 4K1

<sup>2</sup>Department of Health Research Methods, Evidence, and Impact, McMaster University, 1280 Main Street West, Hamilton, Ontario, Canada, L8S 4K1

<sup>3</sup>Brantford General Hospital, 200 Terrace Hill Street, Brantford, Ontario, Canada, N3R 1G9

<sup>4</sup>Department of Pediatrics, McMaster University, 1280 Main Street West, Hamilton, Ontario, Canada, L8S 4K1

<sup>5</sup>Maternal Fetal Medicine Division, Mount Sinai Hospital, 600 University Avenue, Toronto, Ontario, Canada, M4G 1X5

<sup>6</sup>Department of Obstetrics and Gynaecology, St. Joseph's Healthcare, 301 James St. South, Hamilton, Ontario, Canada, L8N 4A6

<sup>7</sup>Department of Family Medicine, McMaster University, 1280 Main St. West, Hamilton, Ontario, Canada, L8S 4K1

<sup>8</sup>Burlington & Area Midwives, 4332 New Street, Burlington, Ontario, Canada L7L 1T5

<sup>9</sup>Community Midwives of Hamilton, 356 Main Street West, Hamilton, Ontario, Canada, L8P 1K2

<sup>10</sup>Biostatistics Unit/FSORC, St. Joseph's Healthcare, 50 Charlton Avenue East, Hamilton, Ontario, Canada, L8N 4A6

### **Corresponding Author:**

Dr. Sarah D. McDonald

[mcdonalds@mcmaster.ca](mailto:mcdonalds@mcmaster.ca)

*Supplementary Information 1.* PRagmatic Explanatory Continuum Indicator Summary-2 (PRECIS-2) wheel for the design and implementation of a pilot cluster randomized controlled trial on a carepath for obese pregnant women

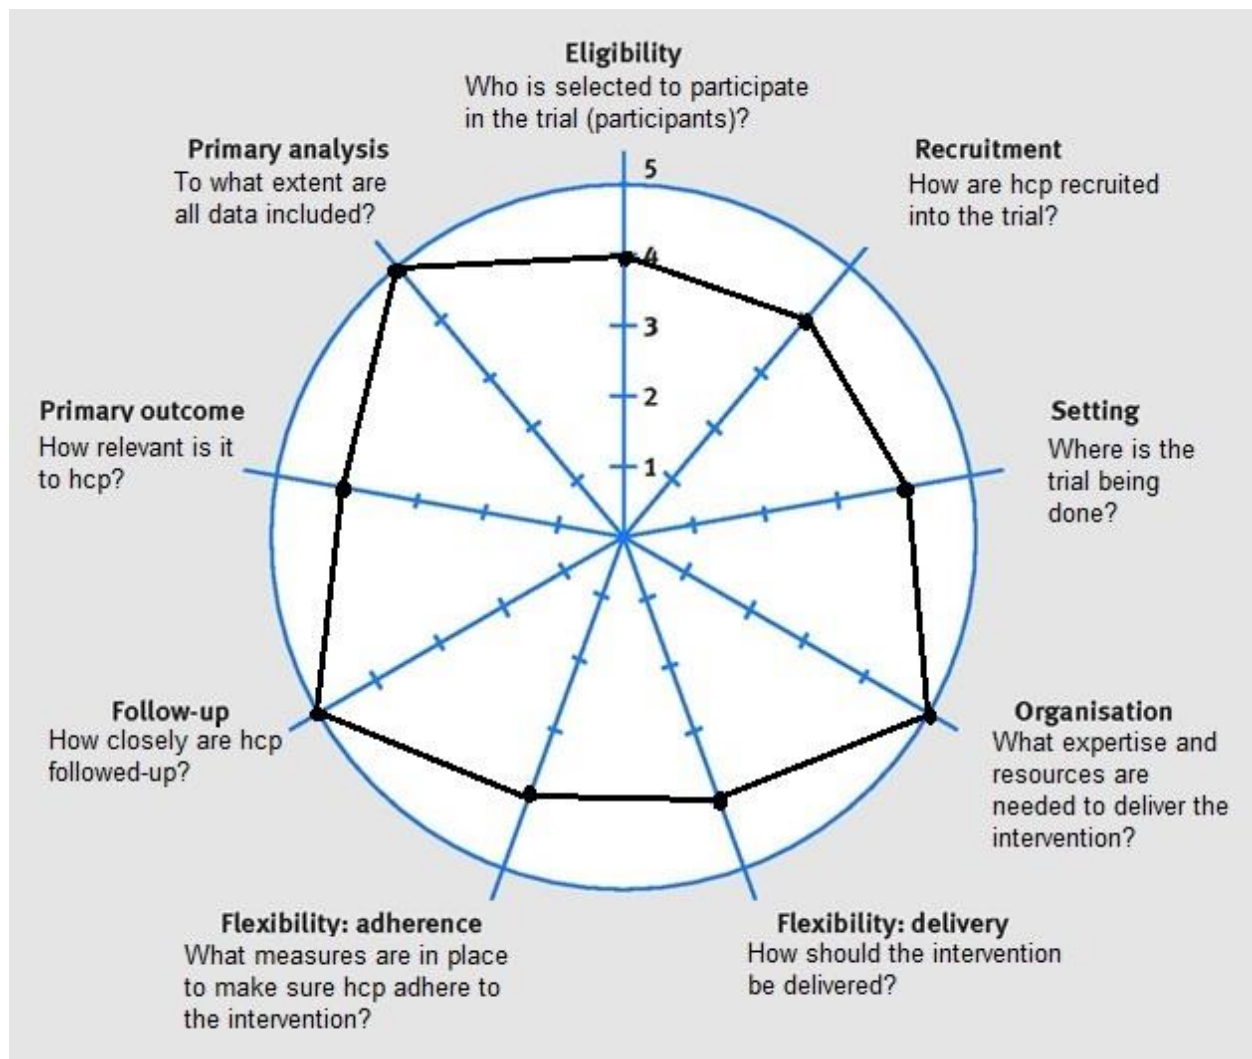

Results are for the design and implementation of the pilot cluster randomized controlled trial of a carepath for obese pregnant women, which were identical. PRECIS-2 wheels of design and implementation are superimposed.

1: Very explanatory; 2: Rather explanatory; 3: Equally pragmatic and explanatory; 4: Rather pragmatic; 5: Very pragmatic; hcp: health care provider

Using the PRagmatic Explanatory Continuum Indicator Summary-2 Tool, across all nine domains, this trial was assessed to be either "rather pragmatic" or "very pragmatic", in contrast to an "explanatory trial".
