# Supplementary material
Source: publisher figshare collection journal article supplement (https://tandf.figshare.com/articles/dataset/_/6634424)
Supplement: Supplementary file 2 [file 3]

## **A Clinical Carepath for Obese Pregnant Women: A Pragmatic Pilot Cluster Randomized Controlled Trial**

Sarah D. McDonald, BA, MD, FRCSC, MSc<sup>1,2</sup>, Kristen A. Viaje, BHSc<sup>1</sup>, Rebecca A. Rooney, MD<sup>3</sup>, Alexander Jarde, PhD<sup>1</sup>, Lucia Giglia, MD, FRCPC<sup>4</sup>, Cynthia V. Maxwell, MD, FRCSC<sup>5</sup>, David Small, BSc, MD, FRCSC<sup>1,6</sup>, Tracy Pearce Kelly, BScN, BHSc Midwifery, RN, RM<sup>7,8</sup>, Lisa Sabatino, RM<sup>9</sup>, Lehana Thabane, BSc, MSc, PhD<sup>2,10</sup>

<sup>1</sup>Department of Obstetrics and Gynaecology, McMaster University, 1280 Main Street West, Hamilton, Ontario, Canada, L8S 4K1

<sup>2</sup>Department of Health Research Methods, Evidence, and Impact, McMaster University, 1280 Main Street West, Hamilton, Ontario, Canada, L8S 4K1

<sup>3</sup>Brantford General Hospital, 200 Terrace Hill Street, Brantford, Ontario, Canada, N3R 1G9

<sup>4</sup>Department of Pediatrics, McMaster University, 1280 Main Street West, Hamilton, Ontario, Canada, L8S 4K1

<sup>5</sup>Maternal Fetal Medicine Division, Mount Sinai Hospital, 600 University Avenue, Toronto, Ontario, Canada, M4G 1X5

<sup>6</sup>Department of Obstetrics and Gynaecology, St. Joseph's Healthcare, 301 James St. South, Hamilton, Ontario, Canada, L8N 4A6

<sup>7</sup>Department of Family Medicine, McMaster University, 1280 Main St. West, Hamilton, Ontario, Canada, L8S 4K1

<sup>8</sup>Burlington & Area Midwives, 4332 New Street, Burlington, Ontario, Canada L7L 1T5

<sup>9</sup>Community Midwives of Hamilton, 356 Main Street West, Hamilton, Ontario, Canada, L8P 1K2

<sup>10</sup>Biostatistics Unit/FSORC, St. Joseph's Healthcare, 50 Charlton Avenue East, Hamilton, Ontario, Canada, L8N 4A6

### **Corresponding Author:**

Dr. Sarah D. McDonald

[mcdonals@mcmaster.ca](mailto:mcdonals@mcmaster.ca)

*Supplementary Information 3. Midwifery outcome rates in pilot cluster randomized controlled trial of a carepath for obese pregnant women*

| <b>Steps offered to eligible women</b>                                      |                                                                                          | <b>Intervention<br/>Number (%)<sup>1</sup></b> | <b>Control<br/>Number<br/>(%)</b> | <b>RR (95% CI)</b> |
|-----------------------------------------------------------------------------|------------------------------------------------------------------------------------------|------------------------------------------------|-----------------------------------|--------------------|
| 1 <sup>st</sup><br>trimester                                                | Early screen for undiagnosed pre-pregnancy diabetes                                      | 14 (100)                                       | 5 (17.9)                          | 5.60 (2.53-12.39)  |
|                                                                             | Nuchal translucency ultrasound                                                           | 11 (100)                                       | 23 (100)                          | --                 |
|                                                                             | Body mass index calculation from pre-pregnancy height and weight                         | 15 (100)                                       | 27 (96.4)                         | 1.03 (0.97-1.11)   |
|                                                                             | Counselled about exercise                                                                | 9 (60)                                         | 24 (85.7)                         | 0.70 (0.45-1.09)   |
|                                                                             | Counselled about weight gain                                                             | 8 (53.3)                                       | 3 (10.7)                          | 4.98 (1.55-16.03)  |
|                                                                             | Counselled about nutrition/food choices                                                  | 11 (73.3)                                      | 24 (85.7)                         | 0.86 (0.61-1.20)   |
|                                                                             | Advised about cardiac/pulmonary disease                                                  | 4 (26.7)                                       | 0 (0.0)                           | --                 |
|                                                                             | Advised about gestational hypertension                                                   | 7 (46.7)                                       | 4 (14.3)                          | 3.27 (1.14-9.39)   |
|                                                                             | Advised about gestational diabetes mellitus                                              | 15 (100)                                       | 28 (100)                          | --                 |
|                                                                             | Obstructive sleep apnea screen                                                           | 11 (73.3)                                      | 0 (0.0)                           | --                 |
|                                                                             | Maternal-fetal medicine specialist referral if history of bariatric surgery <sup>2</sup> | --                                             | --                                | --                 |
| 2 <sup>nd</sup><br>trimester                                                | Maternal serum alpha-fetoprotein screen                                                  | 14 (100)                                       | 24 (100)                          | --                 |
|                                                                             | Anatomy ultrasound                                                                       | 15 (100)                                       | 27 (96.4)                         | 1.04 (0.97-1.11)   |
|                                                                             | Screen for diagnosis of gestational diabetes mellitus                                    | 10 (90.9)                                      | 27 (96.4)                         | 0.94 (0.77-1.15)   |
| 3 <sup>rd</sup><br>trimester                                                | Obstetrician consult                                                                     | 9 (60)                                         | 9 (33.3)                          | 1.80 (0.92-3.53)   |
|                                                                             | Anaesthesiology consult                                                                  | 8 (53.3)                                       | 8 (28.6)                          | 1.87 (0.88-3.96)   |
|                                                                             | Ultrasound for growth & wellbeing                                                        | 13 (86.7)                                      | 19 (67.9)                         | 1.28 (0.92-1.76)   |
|                                                                             | Counselled about shoulder dystocia                                                       | 4 (26.7)                                       | 3 (10.7)                          | 2.49 (0.64-9.69)   |
|                                                                             | Counselled about risk of caesarean section                                               | 6 (40)                                         | 2 (7.1)                           | 5.60 (1.28-24.41)  |
|                                                                             | Counselled about operative risk associated with caesarean section                        | 3 (20)                                         | 1 (3.6)                           | 5.60 (0.64-49.27)  |
|                                                                             | Counselled about risks of high body mass index                                           | 2 (13.3)                                       | 0 (0.0)                           | --                 |
|                                                                             | Discussed breastfeeding                                                                  | 7 (46.7)                                       | 26 (92.9)                         | 0.50 (0.29-0.87)   |
| Total Compliance                                                            |                                                                                          | 196 (64.3)                                     | 284 (49.1)                        | 1.31 (1.16-1.47)   |
| <b>Steps received in eligible women</b>                                     |                                                                                          |                                                |                                   |                    |
| Early screen for undiagnosed pre-pregnancy diabetes                         |                                                                                          | 10 (71.4)                                      | 3 (60)                            | 1.19 (0.54-2.62)   |
| Nuchal translucency ultrasound                                              |                                                                                          | 6 (54.6)                                       | 13 (56.5)                         | 0.97 (0.50-1.84)   |
| Obstructive sleep apnea screen                                              |                                                                                          | 7 (63.6)                                       | 0 (0.0)                           | --                 |
| Maternal-fetal medicine specialist referral if history of bariatric surgery |                                                                                          | --                                             | --                                | --                 |
| Maternal serum alpha-fetoprotein screen                                     |                                                                                          | 7 (50)                                         | 14 (58.3)                         | 0.86 (0.46-1.60)   |
| Anatomy ultrasound                                                          |                                                                                          | 15 (100)                                       | 27 (100)                          | --                 |
| Screen for diagnosis of gestational diabetes mellitus                       |                                                                                          | 8 (80)                                         | 24 (88.9)                         | 0.90 (0.64-1.26)   |
| Anaesthesiology consult                                                     |                                                                                          | 5 (62.5)                                       | 5 (62.5)                          | 1.00 (0.47-2.14)   |
| Ultrasound for growth and wellbeing                                         |                                                                                          | 12 (92.3)                                      | 15 (79.0)                         | 1.17 (0.88-1.55)   |
| <b>Clinical outcomes detected in eligible women tested</b>                  |                                                                                          |                                                |                                   |                    |
| Maternal                                                                    |                                                                                          |                                                |                                   |                    |
| Pre-pregnancy diabetes mellitus                                             |                                                                                          | 3 (30)                                         | 0 (0.0)                           | --                 |
| Obstructive sleep apnea                                                     |                                                                                          | 1 (14.3)                                       | 0 (0.0)                           | --                 |
| Gestational diabetes mellitus                                               |                                                                                          | 2 (25)                                         | 1 (4.4)                           | 5.75 (0.60-55.19)  |
| Fetal                                                                       |                                                                                          |                                                |                                   |                    |
| Cardiac defect                                                              |                                                                                          | 0 (0.0)                                        | 0 (0.0)                           | --                 |

|                    |         |         |    |
|--------------------|---------|---------|----|
| Neural tube defect | 0 (0.0) | 0 (0.0) | -- |
|--------------------|---------|---------|----|

Note: Proportions not always out of total number per group due to some women being ineligible for the screen, test, or consult  
RR: relative risk; 95% CI: 95% confidence interval; "--": not applicable  
<sup>1</sup>Guideline-directed step in the clinical carepath is considered feasible if >80% rate of offer; <sup>2</sup>None of the women had a history of bariatric surgery
