# Supplementary material
Source: publisher figshare collection journal article supplement (https://tandf.figshare.com/articles/dataset/_/6634424)
Supplement: Supplementary file 3 [file 3]

## **A Clinical Carepath for Obese Pregnant Women: A Pragmatic Pilot Cluster Randomized Controlled Trial**

Sarah D. McDonald, BA, MD, FRCSC, MSc<sup>1,2</sup>, Kristen A. Viaje, BHSc<sup>1</sup>, Rebecca A. Rooney, MD<sup>3</sup>, Alexander Jarde, PhD<sup>1</sup>, Lucia Giglia, MD, FRCPC<sup>4</sup>, Cynthia V. Maxwell, MD, FRCSC<sup>5</sup>, David Small, BSc, MD, FRCSC<sup>1,6</sup>, Tracy Pearce Kelly, BScN, BHSc Midwifery, RN, RM<sup>7,8</sup>, Lisa Sabatino, RM<sup>9</sup>, Lehana Thabane, BSc, MSc, PhD<sup>2,10</sup>

<sup>1</sup>Department of Obstetrics and Gynaecology, McMaster University, 1280 Main Street West, Hamilton, Ontario, Canada, L8S 4K1

<sup>2</sup>Department of Health Research Methods, Evidence, and Impact, McMaster University, 1280 Main Street West, Hamilton, Ontario, Canada, L8S 4K1

<sup>3</sup>Brantford General Hospital, 200 Terrace Hill Street, Brantford, Ontario, Canada, N3R 1G9

<sup>4</sup>Department of Pediatrics, McMaster University, 1280 Main Street West, Hamilton, Ontario, Canada, L8S 4K1

<sup>5</sup>Maternal Fetal Medicine Division, Mount Sinai Hospital, 600 University Avenue, Toronto, Ontario, Canada, M4G 1X5

<sup>6</sup>Department of Obstetrics and Gynaecology, St. Joseph's Healthcare, 301 James St. South, Hamilton, Ontario, Canada, L8N 4A6

<sup>7</sup>Department of Family Medicine, McMaster University, 1280 Main St. West, Hamilton, Ontario, Canada, L8S 4K1

<sup>8</sup>Burlington & Area Midwives, 4332 New Street, Burlington, Ontario, Canada L7L 1T5

<sup>9</sup>Community Midwives of Hamilton, 356 Main Street West, Hamilton, Ontario, Canada, L8P 1K2

<sup>10</sup>Biostatistics Unit/FSORC, St. Joseph's Healthcare, 50 Charlton Avenue East, Hamilton, Ontario, Canada, L8N 4A6

### **Corresponding Author:**

Dr. Sarah D. McDonald

[mcdonalds@mcmaster.ca](mailto:mcdonalds@mcmaster.ca)

*Supplementary Information 4.* Provider baseline characteristics in a pilot cluster randomized controlled trial of a carepath for obese pregnant women

| Health care provider characteristics                                                                      | Number |
|-----------------------------------------------------------------------------------------------------------|--------|
| Sex                                                                                                       |        |
| Male                                                                                                      | 1      |
| Female                                                                                                    | 7      |
| Profession                                                                                                |        |
| Obstetrician                                                                                              | 3      |
| Midwife                                                                                                   | 5      |
| Years in practice with current profession                                                                 |        |
| 0-5                                                                                                       | 4      |
| 6-15                                                                                                      | 4      |
| >15                                                                                                       | 0      |
| Number of new obese pregnant women health care provider sees in a typical month for ongoing prenatal care |        |
| 0-3                                                                                                       | 6      |
| 4-6                                                                                                       | 2      |
| $\geq 7$                                                                                                  | 0      |
| Used the clinical carepath in the majority of obese women                                                 | 5      |
