# Supplementary material
Source: publisher figshare collection journal article supplement (https://tandf.figshare.com/articles/dataset/_/6634424)
Supplement: Supplementary file 4 [file 3]

## **A Clinical Carepath for Obese Pregnant Women: A Pragmatic Pilot Cluster Randomized Controlled Trial**

Sarah D. McDonald, BA, MD, FRCSC, MSc<sup>1,2</sup>, Kristen A. Viaje, BHSc<sup>1</sup>, Rebecca A. Rooney, MD<sup>3</sup>, Alexander Jarde, PhD<sup>1</sup>, Lucia Giglia, MD, FRCPC<sup>4</sup>, Cynthia V. Maxwell, MD, FRCSC<sup>5</sup>, David Small, BSc, MD, FRCSC<sup>1,6</sup>, Tracy Pearce Kelly, BScN, BHSc Midwifery, RN, RM<sup>7,8</sup>, Lisa Sabatino, RM<sup>9</sup>, Lehana Thabane, BSc, MSc, PhD<sup>2,10</sup>

<sup>1</sup>Department of Obstetrics and Gynaecology, McMaster University, 1280 Main Street West, Hamilton, Ontario, Canada, L8S 4K1

<sup>2</sup>Department of Health Research Methods, Evidence, and Impact, McMaster University, 1280 Main Street West, Hamilton, Ontario, Canada, L8S 4K1

<sup>3</sup>Brantford General Hospital, 200 Terrace Hill Street, Brantford, Ontario, Canada, N3R 1G9

<sup>4</sup>Department of Pediatrics, McMaster University, 1280 Main Street West, Hamilton, Ontario, Canada, L8S 4K1

<sup>5</sup>Maternal Fetal Medicine Division, Mount Sinai Hospital, 600 University Avenue, Toronto, Ontario, Canada, M4G 1X5

<sup>6</sup>Department of Obstetrics and Gynaecology, St. Joseph's Healthcare, 301 James St. South, Hamilton, Ontario, Canada, L8N 4A6

<sup>7</sup>Department of Family Medicine, McMaster University, 1280 Main St. West, Hamilton, Ontario, Canada, L8S 4K1

<sup>8</sup>Burlington & Area Midwives, 4332 New Street, Burlington, Ontario, Canada L7L 1T5

<sup>9</sup>Community Midwives of Hamilton, 356 Main Street West, Hamilton, Ontario, Canada, L8P 1K2

<sup>10</sup>Biostatistics Unit/FSORC, St. Joseph's Healthcare, 50 Charlton Avenue East, Hamilton, Ontario, Canada, L8N 4A6

### **Corresponding Author:**

Dr. Sarah D. McDonald

[mcdonals@mcmaster.ca](mailto:mcdonals@mcmaster.ca)

*Supplementary Information 5. Care provider views of a carepath for obese pregnant women in cluster pilot randomized controlled trial*

| <b>Questionnaire statements<sup>1</sup></b>                                                                                                 |  | <b>Number</b> |
|---------------------------------------------------------------------------------------------------------------------------------------------|--|---------------|
| Would or strongly would recommend this carepath to a colleague (acceptability)                                                              |  | 5             |
| Very or somewhat easy to use the carepath in every day practice (feasibility)                                                               |  | 5             |
| Women are much or moderately more likely to receive the appropriate care with the carepath (usefulness)                                     |  | 5             |
| <b>Barriers<sup>2</sup></b>                                                                                                                 |  |               |
| None                                                                                                                                        |  | 3             |
| Lack of time to implement the carepath                                                                                                      |  | 3             |
| Office staff turnover                                                                                                                       |  | 2             |
| Other staffing issues                                                                                                                       |  | 0             |
| Shared care                                                                                                                                 |  | 2             |
| Carepath recommendations are unclear/confusing                                                                                              |  | 0             |
| Carepath recommendations are impractical                                                                                                    |  | 0             |
| Carepath recommendations are too complex                                                                                                    |  | 0             |
| Lack of familiarity with the Society of Obstetricians and Gynecologists of Canada (SOGC) obesity guidelines on which the carepath was based |  | 0             |
| Lack of belief that implementing the carepath would make a difference                                                                       |  | 0             |
| Prefer not to change my practice                                                                                                            |  | 0             |
| Women may not want to follow the carepath recommendations                                                                                   |  | 1             |
| Lack of consultant resources                                                                                                                |  | 1             |
| Lack of educational materials for women                                                                                                     |  | 0             |
| Other <sup>3</sup>                                                                                                                          |  | 2             |
| <b>Facilitators<sup>1</sup></b>                                                                                                             |  |               |
| None                                                                                                                                        |  | 0             |
| The carepath was based on SOGC obesity guidelines                                                                                           |  | 2             |
| Motivation to improve clinical care for obese pregnant women                                                                                |  | 5             |
| The layout of the carepath                                                                                                                  |  | 4             |
| Adequate time to implement the carepath                                                                                                     |  | 2             |
| Available resources for prevention                                                                                                          |  | 1             |
| Layout of the carepath on the front page                                                                                                    |  | 5             |
| Use of checkboxes on the front page                                                                                                         |  | 5             |
| Sleep apnea screen                                                                                                                          |  | 4             |
| Tables of reference ranges for increased risk                                                                                               |  | 5             |
| Provides all the information needed to deliver high-quality care                                                                            |  | 5             |
| Identifies all obstetrical issues that should be documented in the care of obese women                                                      |  | 5             |
| Decreases workload                                                                                                                          |  | 1             |
| Decreases variation in care of obese pregnant women                                                                                         |  | 4             |
| Decreases uncertainty in management of obese pregnant women                                                                                 |  | 4             |
| Increases my knowledge of clinical care of obese pregnant women                                                                             |  | 5             |
| Increases obese pregnant women's knowledge of risks                                                                                         |  | 5             |
| Does not require more training to implement                                                                                                 |  | 3             |
| Other                                                                                                                                       |  | 0             |
| <b>Usefulness of reverse side of carepath with reference information<sup>1</sup></b>                                                        |  |               |
| Tables for glucose challenge and oral glucose tolerance tests (GCT/OGTT) are useful                                                         |  | 3             |
| Tables of risk increase are useful                                                                                                          |  | 5             |
| Body mass index chart is useful                                                                                                             |  | 3             |
| Screen for obstructive sleep apnea is useful                                                                                                |  | 4             |

SOGC: Society of Obstetricians and Gynecologists of Canada; GCT: glucose challenge test; OGTT: oral glucose tolerance test

<sup>1</sup>Denominator is out of number of health care providers who used the clinical carepath in the majority of obese pregnant women (5)

<sup>2</sup>Denominator is out of number of health care providers who completed the survey (8)

<sup>3</sup>Other barriers included (1) forgetting to include it in the patient's chart, and (2) wanting to counsel women about obesity in a nice way
