# Supplementary material
Source: publisher figshare collection journal article supplement (https://tandf.figshare.com/articles/dataset/_/6634424)
Supplement: Supplementary file 5 [file 3]

1. BMI  $\geq 30 \text{ kg/m}^2$  pre-pregnancy? **yes** ☐ **no** ☐  
OR if unavailable, first BMI during pregnancy

2. Singleton, no known lethal anomalies? **yes** ☐ **no** ☐

If any 'no'

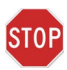

as patient is **not eligible**, but please lock this form in a secure place for the research team to collect

Name

### CHECK ACCORDING TO THE CARE YOU OFFERED (NOT A PRIOR CLINIC)

| Timing                 |                                                                                                                                                                                                                                                                                                             | Accepted with me                 | Declined with me                     | I Did Not Offer b/c...                                                                                                |
|------------------------|-------------------------------------------------------------------------------------------------------------------------------------------------------------------------------------------------------------------------------------------------------------------------------------------------------------|----------------------------------|--------------------------------------|-----------------------------------------------------------------------------------------------------------------------|
| T1                     | <b>75g OGTT or 50g GCT (turn page over)</b><br>(for undiagnosed diabetes before pregnancy)                                                                                                                                                                                                                  | <input type="checkbox"/>         | <input type="checkbox"/>             | <input type="checkbox"/> presented too late to me                                                                     |
|                        | <b>NT</b><br>(provides accurate dating; offer up to 14 wks as a screen for heart defects – even if Down Syndrome screening declined – as higher incidence in obesity)                                                                                                                                       | <input type="checkbox"/>         | <input type="checkbox"/>             | <input type="checkbox"/> presented too late to me                                                                     |
|                        | <b>BMI calculation from pre-pregnancy height and weight (turn page over)</b> (for counselling women about pregnancy risks)                                                                                                                                                                                  | Advised <input type="checkbox"/> | Not Advised <input type="checkbox"/> |                                                                                                                       |
|                        | <b>Counselling (turn page over)</b><br>(about exercise, weight gain [ $\frac{1}{2}$ pound/wk in T2 & T3], nutrition, food choices)                                                                                                                                                                          | Advised <input type="checkbox"/> | Not Advised <input type="checkbox"/> |                                                                                                                       |
|                        | <b>Advising</b><br>(risk for medical complications such as cardiac disease, pulmonary disease, gestational hypertension, GDM)                                                                                                                                                                               | Advised <input type="checkbox"/> | Not Advised <input type="checkbox"/> |                                                                                                                       |
|                        | <b>Obstructive sleep apnea screen (turn page over)</b><br>(if abnormal, consider sending for sleep apnea testing)                                                                                                                                                                                           | <input type="checkbox"/>         | <input type="checkbox"/>             |                                                                                                                       |
|                        | <b>If Bariatric Surgery, suggest MFM referral</b>                                                                                                                                                                                                                                                           | <input type="checkbox"/>         | <input type="checkbox"/>             |                                                                                                                       |
| T2                     | <b>MS-AFP</b><br>(ideally 15 wks but up to 20+ 6; higher rate spina bifida in obesity)                                                                                                                                                                                                                      | <input type="checkbox"/>         | <input type="checkbox"/>             | <input type="checkbox"/> presented too late to me                                                                     |
|                        | <b>Anatomy ultrasound</b><br>(increased risk of heart defects & spina bifida)                                                                                                                                                                                                                               | <input type="checkbox"/>         | <input type="checkbox"/>             | <input type="checkbox"/> presented too late to me                                                                     |
|                        | <b>75g OGTT or 50 g GCT (turn page over)</b><br>(for diagnosis of GDM)                                                                                                                                                                                                                                      | <input type="checkbox"/>         | <input type="checkbox"/>             | <input type="checkbox"/> presented too late to me                                                                     |
| T3                     | <b>Consider consultation with anaesthesiology</b><br>(increased anaesthetic challenges)                                                                                                                                                                                                                     | <input type="checkbox"/>         | <input type="checkbox"/>             | <input type="checkbox"/> anaesthesia prefer to see only highest BMI<br><input type="checkbox"/> other (specify) _____ |
|                        | <b>Consider ultrasound for growth &amp; wellbeing</b><br>(increased stillbirth & planning mode of birth)                                                                                                                                                                                                    | <input type="checkbox"/>         | <input type="checkbox"/>             |                                                                                                                       |
|                        | <b>Counselling</b><br>(increased risk of operative vaginal delivery, shoulder dystocia, c/s, operative risk associated with c/s)                                                                                                                                                                            | Advised <input type="checkbox"/> | Not Advised <input type="checkbox"/> |                                                                                                                       |
|                        | <b>Discussion of breastfeeding</b> (decrease in childhood obesity)                                                                                                                                                                                                                                          | Advised <input type="checkbox"/> | Not Advised <input type="checkbox"/> |                                                                                                                       |
| Birth                  | <b>Higher dose of antibiotic to prevent wound infection</b><br>(3 g Ancef i.v. at c/s)                                                                                                                                                                                                                      | Given <input type="checkbox"/>   | Not Given <input type="checkbox"/>   | Don't know <input type="checkbox"/>                                                                                   |
|                        | <b>DVT prophylaxis (turn page over)</b> (evaluate the risk for each woman)                                                                                                                                                                                                                                  | Given <input type="checkbox"/>   | Not Given <input type="checkbox"/>   | Contraindicated <input type="checkbox"/> Don't know <input type="checkbox"/>                                          |
| Post-partum<br>~ 6 wks | <b>Advise 1.0 mg folic acid preconception</b> (SOGC 2015)                                                                                                                                                                                                                                                   | Advised <input type="checkbox"/> | Not Advised <input type="checkbox"/> | <input type="checkbox"/> Not seen postpartum                                                                          |
|                        | <b>Encourage healthiest weight possible</b>                                                                                                                                                                                                                                                                 | Advised <input type="checkbox"/> | Not Advised <input type="checkbox"/> | <input type="checkbox"/> Not seen postpartum                                                                          |
|                        | <b>If GDM +, advise 75g OGTT with Fam MD</b>                                                                                                                                                                                                                                                                | Advised <input type="checkbox"/> | Not Advised <input type="checkbox"/> | <input type="checkbox"/> Not seen postpartum                                                                          |
|                        | <b>Advise appropriate contraception</b><br>(Risks with Combined Hormonal Contraception increase with BMI>30. With BMI>35, alternatives, such as progestin-only methods, or expert consultation are suggested in the UK <sup>(UK MEC RCOG 2010)</sup> [but not in the US; Canadian guidelines are upcoming]) | Advised <input type="checkbox"/> | Not Advised <input type="checkbox"/> | <input type="checkbox"/> Not seen postpartum                                                                          |

Legend: c/s=caesarean section; DVT=venous thromboembolism; GCT=glucose challenge test; GDM=gestational diabetes mellitus; MS-AFP=maternal serum alpha fetal protein; NT=nuchal translucency; T1=1<sup>st</sup> trimester; T2=2<sup>nd</sup> trimester; T3=3<sup>rd</sup> trimester

## ABNORMAL CUT-OFF VALUES TEST FOR GESTATIONAL DIABETES

|                                                                             | 2 step (CDA prefers)                                                | 1 step                   |
|-----------------------------------------------------------------------------|---------------------------------------------------------------------|--------------------------|
| GCT 50g                                                                     | 7.8 -11.0 mmol/L                                                    | <i>Do not do</i>         |
| OGTT 75g<br>(if 1 is high=<br>gestational<br>diabetes*→diet,<br>+dietician) | fasting ≥ 5.3 mmol/L<br>1-hour ≥ 10.6 mmol/L<br>2-hour ≥ 9.0 mmol/L | ≥ 5.1<br>≥ 10.0<br>≥ 8.5 |

\*CDA Can J Diabetes 2013

Diagnosis of diabetes if: Any fasting glu ≥ 7.0 mmol/L,  
2 hr glu ≥ 11.1 mmol/L, HbA1c ≥ 6.5%

## TABLE OF RISK INCREASE (OBESE VS. NORMAL WEIGHT)

|                            | Risk increase in obese vs. normal weight | Absolute risk in obese vs. normal weight |
|----------------------------|------------------------------------------|------------------------------------------|
| <b>Congenital ♥ Defect</b> | 30% increase (1.3x)                      | 1.3% vs. 1.0% <sup>†</sup>               |
| <b>GDM</b>                 | 200% increase (3x)                       | 14.2% vs. 4.3% <sup>‡</sup>              |
| <b>PTB &lt;33 wks</b>      | 25% increase (1.25x)                     | 2.8% vs. 2.5% <sup>¶</sup>               |
| <b>Stillbirth</b>          | 180% increase (2.8x)                     | 11.6% vs. 4.1% <sup>‡</sup>              |
| <b>Macrosomia</b>          | 110% increase (2.1x)                     | 11.2% vs. 5.6% <sup>¶</sup>              |
| <b>C/S-Obese</b>           | 100% increase (2x)                       | 16.7% vs. 10.9% <sup>¶</sup>             |
| <b>C/S-Severely Obese</b>  | 190% increase (2.9x)                     | 21.5% vs. 10.9% <sup>¶</sup>             |

Legend: GDM=gestational diabetes; PTB=preterm birth; C/S=caesarean section; †Brite Int J Obes 2014; ‡Bianco Obstet Gynecol 1998; ¶McDonald BMJ 2010; ‡Kristensen Int J Obes 2005; ¶Langer AJOG 2005; ¶Cedergren Obstet Gynecol 2004

## BODY MASS INDEX (BMI) CHART FOR ADULTS

BMI ≥ 30 = Obese

| Weight (lbs)   | 135         | 140  | 145  | 150  | 155           | 160  | 165  | 170  | 175  | 180  | 185  | 190  | 195  | 200  | 205        | 210  | 215  | 220 | 225   | 230   | 235   | 240   | 245   | 250   | 255   | 260   | 265   | 270   |    |    |
|----------------|-------------|------|------|------|---------------|------|------|------|------|------|------|------|------|------|------------|------|------|-----|-------|-------|-------|-------|-------|-------|-------|-------|-------|-------|----|----|
| Weight (kgs)   | 61.4        | 63.6 | 65.9 | 68.2 | 70.5          | 72.7 | 75.0 | 77.3 | 79.5 | 81.8 | 84.1 | 86.4 | 88.6 | 90.9 | 93.2       | 95.5 | 97.7 | 100 | 102.3 | 104.5 | 106.8 | 109.1 | 111.4 | 113.6 | 115.7 | 117.9 | 120.2 | 122.5 |    |    |
| 5'0"           | 152.4       | 26   | 27   | 28   | 29            | 30   | 31   | 32   | 33   | 34   | 35   | 36   | 37   | 38   | 39         | 40   | 41   | 42  | 43    | 44    | 45    | 46    | 47    | 48    | 49    | 50    | 51    | 52    | 53 |    |
| 5'1"           | 154.9       | 25   | 26   | 27   | 28            | 29   | 30   | 31   | 32   | 33   | 34   | 35   | 36   | 37   | 39         | 40   | 41   | 42  | 43    | 43    | 44    | 45    | 46    | 47    | 48    | 49    | 50    | 51    | 52 |    |
| 5'2"           | 157.4       | 24   | 25   | 26   | 27            | 28   | 29   | 30   | 31   | 32   | 33   | 33   | 34   | 35   | 36         | 38   | 38   | 39  | 40    | 41    | 42    | 43    | 44    | 45    | 46    | 47    | 48    | 48    | 49 |    |
| 5'3"           | 160.0       | 23   | 24   | 25   | 26            | 27   | 28   | 29   | 30   | 31   | 32   | 32   | 33   | 34   | 35         | 36   | 37   | 38  | 39    | 40    | 41    | 42    | 43    | 43    | 44    | 45    | 46    | 47    | 48 |    |
| 5'4"           | 162.5       | 23   | 24   | 24   | 25            | 26   | 27   | 28   | 29   | 30   | 31   | 31   | 32   | 33   | 34         | 35   | 36   | 37  | 38    | 39    | 39    | 40    | 41    | 42    | 43    | 44    | 45    | 46    | 47 |    |
| 5'5"           | 165.1       | 22   | 23   | 24   | 25            | 25   | 26   | 27   | 28   | 29   | 30   | 30   | 31   | 32   | 33         | 34   | 35   | 36  | 37    | 37    | 38    | 39    | 40    | 41    | 42    | 42    | 43    | 44    | 45 |    |
| 5'6"           | 167.6       | 21   | 23   | 23   | 24            | 25   | 25   | 26   | 27   | 28   | 29   | 29   | 30   | 31   | 32         | 33   | 34   | 35  | 36    | 36    | 37    | 38    | 39    | 40    | 40    | 41    | 42    | 43    | 44 |    |
| 5'7"           | 170.1       | 21   | 22   | 23   | 23            | 24   | 25   | 25   | 26   | 27   | 28   | 29   | 29   | 30   | 31         | 32   | 33   | 34  | 34    | 35    | 36    | 37    | 38    | 38    | 39    | 40    | 41    | 42    | 42 |    |
| 5'8"           | 172.7       | 20   | 21   | 22   | 23            | 23   | 24   | 25   | 25   | 26   | 27   | 28   | 29   | 29   | 30         | 31   | 32   | 33  | 33    | 34    | 35    | 36    | 36    | 37    | 38    | 39    | 40    | 40    | 41 |    |
| 5'9"           | 175.2       | 19   | 21   | 21   | 22            | 23   | 23   | 24   | 25   | 25   | 26   | 27   | 28   | 28   | 29         | 30   | 31   | 32  | 32    | 33    | 34    | 35    | 35    | 36    | 37    | 38    | 38    | 39    | 40 |    |
| 5'10"          | 177.8       | 19   | 20   | 21   | 21            | 22   | 23   | 23   | 24   | 25   | 25   | 26   | 27   | 28   | 28         | 29   | 30   | 31  | 32    | 32    | 33    | 34    | 34    | 35    | 36    | 37    | 37    | 38    | 39 |    |
| 5'11"          | 180.3       | 18   | 19   | 20   | 21            | 21   | 22   | 23   | 23   | 24   | 25   | 25   | 26   | 27   | 28         | 29   | 29   | 30  | 31    | 31    | 32    | 33    | 33    | 34    | 35    | 36    | 36    | 37    | 38 |    |
| 6'0"           | 182.8       | 18   | 19   | 19   | 20            | 21   | 21   | 22   | 23   | 23   | 24   | 25   | 25   | 26   | 27         | 28   | 28   | 29  | 30    | 31    | 31    | 32    | 33    | 33    | 34    | 35    | 35    | 36    | 37 |    |
| 6'1"           | 185.4       | 17   | 18   | 19   | 19            | 20   | 21   | 21   | 22   | 23   | 23   | 24   | 25   | 25   | 26         | 27   | 28   | 28  | 29    | 30    | 30    | 31    | 32    | 32    | 33    | 34    | 34    | 35    | 36 |    |
| 6'2"           | 187.9       | 17   | 18   | 18   | 19            | 19   | 20   | 21   | 21   | 22   | 23   | 23   | 24   | 25   | 25         | 26   | 27   | 28  | 28    | 29    | 30    | 30    | 31    | 31    | 32    | 33    | 33    | 34    | 35 |    |
| 6'3"           | 190.5       | 16   | 17   | 18   | 18            | 19   | 19   | 20   | 21   | 21   | 22   | 23   | 23   | 24   | 25         | 26   | 26   | 27  | 27    | 28    | 29    | 29    | 30    | 31    | 31    | 32    | 32    | 33    | 34 |    |
| 6'4"           | 193.0       | 16   | 17   | 17   | 18            | 18   | 19   | 19   | 20   | 21   | 21   | 22   | 23   | 23   | 24         | 25   | 26   | 26  | 27    | 27    | 28    | 28    | 29    | 29    | 30    | 30    | 31    | 32    | 32 | 33 |
| Height (in/cm) | Underweight |      |      |      | Normal Weight |      |      |      |      |      |      |      |      |      | Overweight |      |      |     |       |       |       |       |       |       | Obese |       |       |       |    |    |

For obese women,  
**5-9 kg** is the total  
recommended  
weight gain is,  
~ **½ pound/ week**  
during the 2<sup>nd</sup> & 3<sup>rd</sup>  
trimesters

The 300 additional  
calories/day could  
be achieved with:  
3 glasses of milk  
OR  
3 pieces of fruit  
OR  
1 turkey sandwich  
(no butter or  
mayonnaise)

## SCREEN FOR OBSTRUCTIVE SLEEP APNEA

Please circle Yes or No for each question you ask the woman.

| QUESTION                                                                                        | ANSWER |    |
|-------------------------------------------------------------------------------------------------|--------|----|
| Do you <b>Snore louder than talking</b> or loud enough to be <b>heard through a closed door</b> | Yes    | No |
| Do you <b>often feel Tired, fatigued, or sleepy during daytime</b>                              | Yes    | No |
| Has anyone <b>Observed</b> you <b>stop breathing during your sleep</b>                          | Yes    | No |
| Do you have or are being treated for <b>high blood Pressure</b>                                 | Yes    | No |
| <b>BMI &gt; 35 kg/m<sup>2</sup></b>                                                             | Yes    | No |
| <b>Age &gt; 50 years</b>                                                                        | Yes    | No |
| <b>Neck circumference &gt; 40 cm</b>                                                            | Yes    | No |
| increased risk for sleep apnea, could consider sleep study if ≥ 3 "yes"                         |        |    |

The above (STOP BANG) screen, is the one recommended by Respirioly at HHS outside of pregnancy (Chung et al 2008 p. 812 *Anesthesiology*). The positive predictive value is 33% for sleep apnea in pregnancy, but negative predictive value is 93%, and is one of the best of the screens in pregnancy. (Lockhart 2015 p.93, *Obstet Gynecol*)

## DVT PROPHYLAXIS

| Risk     | Patient Types                                                                                                                                                                                                                                                                                                                                                                                                                                                                                                                                                                                                                          | Treatment/Prophylaxis                                                                                                                                                                                                                                                                                                                                                                                                                                                                                       |
|----------|----------------------------------------------------------------------------------------------------------------------------------------------------------------------------------------------------------------------------------------------------------------------------------------------------------------------------------------------------------------------------------------------------------------------------------------------------------------------------------------------------------------------------------------------------------------------------------------------------------------------------------------|-------------------------------------------------------------------------------------------------------------------------------------------------------------------------------------------------------------------------------------------------------------------------------------------------------------------------------------------------------------------------------------------------------------------------------------------------------------------------------------------------------------|
| Low      | All patients not considered moderate or high risk                                                                                                                                                                                                                                                                                                                                                                                                                                                                                                                                                                                      | Ambulation                                                                                                                                                                                                                                                                                                                                                                                                                                                                                                  |
| Moderate | During antepartum consider tx if immobilization: >24 hours if additional significant co-morbidities [e.g. heart disease]<br>During postpartum consider tx if: <ul style="list-style-type: none"> <li>Immobilization: antepartum ≥ 1 wk, or postpartum &gt;24 hrs (c/s or vaginal birth)</li> <li>BMI &gt; 40 (c/s or vaginal birth)</li> <li>Pelvic infection requiring i.v. antibiotics (except chorioamnionitis) or sepsis (c/s or vaginal birth)</li> <li>Other significant medical co-morbidities (c/s or vaginal birth)</li> <li>Hemorrhage ≥ 1 L post c/s requiring re-operation or evacuation</li> <li>Emergency c/s</li> </ul> | Ambulation AND <b>consider</b> appropriate thrombosis prophylaxis: <ol style="list-style-type: none"> <li>1) LMWH if no contraindication; or</li> <li>2) If contraindication to LMWH: pneumatic compression (moonboots)*; if unavailable TED stockings*; or</li> <li>3) consult Thrombosis Service</li> </ol> <div style="border: 1px solid black; padding: 5px; margin-top: 10px;"> <p>If difficult or multiple attempts at epidural/spinal, consider consultation with anaesthesia before LMWH</p> </div> |
| High     | During ante or postpartum: previous VTE, thrombophilia, Anticoagulation prior to admission, cancer (after c/s or vaginal birth)                                                                                                                                                                                                                                                                                                                                                                                                                                                                                                        | Ambulation AND <b>provide</b> appropriate thrombosis prophylaxis: <ol style="list-style-type: none"> <li>1) LMWH if no contraindication; or</li> <li>2) If contraindication to LMWH: pneumatic compression (moonboots)*; if unavailable TED stockings*; or</li> <li>3) consult Thrombosis Service</li> </ol>                                                                                                                                                                                                |

Legend: \*no data in pregnancy; \*no data in pregnancy or the postpartum, c/s=caesarean section
